# Supplementary material for: Trends in Anterior Cruciate Ligament Repair: A Bibliometric and Visualized Analysis
Source: PubMed Central journal article supplement — Orthop J Sports Med. 2022 Oct 31;10(10):23259671221132564. doi: 10.1177/23259671221132564 (PMC9629579; doi:10.1177/23259671221132564), 2022-10-31
Supplement: sj-pdf-1-ojs-10.1177_23259671221132564.pdf [file sj-pdf-1-ojs-10.1177_23259671221132564.pdf]

## Supplemental Table S1. Search Strategy

---

```
((((anterior cruciate ligament[MeSH Terms] OR ("anterior cruciate ligament"[Title/Abstract])) OR (ACL[Title/Abstract]))) AND (("repair"[Title/Abstract] OR "dynamic intraligamentary stabilization"[Title/Abstract] OR "dynamic intraligamentary stabilisation"[Title/Abstract]))) NOT (("meniscal repair"[Title/Abstract] OR "meniscus repair"[Title/Abstract] OR "rotator cuff repair"[Title/Abstract]) NOT ("ACL repair"[Title/Abstract] OR "anterior cruciate ligament repair"[Title/Abstract]))) NOT (("ACL reconstruction"[Title/Abstract] OR "anterior cruciate ligament reconstruction"[Title/Abstract]) NOT ("ACL repair"[Title/Abstract] OR "anterior cruciate ligament repair"[Title/Abstract]))
```

---

## Supplemental Table S2. Code Used to Extract Publication Details

---

```
1 import json
2 file = open('pubmed-1AND2NOT3N-set.txt')
3
4 s = ""
5 dic = dict()
6 result = []
7
8 for line in file.readlines():
9     if line != '\n':
10
11         if line.startswith('  '):
12             s += line.strip()
13         else:
14             if '-' in s:
15                 temp = s.split('- ')
16                 token = temp[0].strip()
17                 value = temp[1].strip()
18                 if token in dic:
19                     b = dic[token]
20                     if isinstance(b, str):
21                         dic[token] = [b, value]
22                 else:
23                     b.append(value)
24
25             else:
26                 dic[token] = value
27
28             s = line.strip()
29
30         else:
31             result.append(dic)
32             dic = dict()
33
34
35 json.dump(result, open('result.json', 'w'))
36
37
38 key = 'PL'.upper()
39 for d in result:
40     if key in d:
41         print(d[key])
```

---

**Supplemental Table S3. Authors/Institutions Involved in the Resurgence of ACL Repair**

| <i>Author</i>                           | <i>No. of Publications</i> | <i>Institution</i>                                |
|-----------------------------------------|----------------------------|---------------------------------------------------|
| <i>Top 10 authors from 1982 to 1993</i> |                            |                                                   |
| Gillquist J                             | 7                          | Linköping University                              |
| Warren RF                               | 6                          | Hospital for Special Surgery*                     |
| Engebretsen L                           | 4                          | Oslo University                                   |
| Odensten M                              | 4                          | Linköping University                              |
| Wickiewicz TL                           | 4                          | Hospital for Special Surgery*                     |
| Andersson C                             | 3                          | Linköping University                              |
| Benum P                                 | 3                          | Trondheim University                              |
| Bonamo JR                               | 3                          | Staten Island Hospital                            |
| Cross MJ                                | 3                          | North Sydney Orthopaedic & Sports Medicine Center |
| Feagin JA Jr                            | 3                          | Duke University                                   |
| <i>Top 20 authors from 2010 to 2022</i> |                            |                                                   |
| Murray MM                               | 37                         | Boston Children's Hospital                        |
| DiFelice GS                             | 35                         | Hospital for Special Surgery*                     |
| van der List JP                         | 28                         | Hospital for Special Surgery*                     |
| Fleming BC                              | 31                         | Boston Children's Hospital                        |
| Proffen BL                              | 17                         | Boston Children's Hospital                        |
| Kiapour AM                              | 11                         | Boston Children's Hospital                        |
| Hopper GP                               | 10                         | University of Glasgow                             |
| Mackay GM                               | 10                         | University of Stirling                            |
| Micheli LJ                              | 10                         | Boston Children's Hospital                        |
| Vermeijden HD                           | 10                         | Hospital for Special Surgery*                     |
| Henle P                                 | 9                          | Sonnenhof Orthopaedic Center                      |
| Kohl S                                  | 9                          | University of Bern                                |
| Vavken P                                | 9                          | Boston Children's Hospital                        |
| Yen YM                                  | 9                          | Boston Children's Hospital                        |
| Ahmad SS                                | 8                          | University of Bern                                |
| Egglı S                                 | 8                          | Sonnenhof Orthopaedic Center                      |
| Kramer DE                               | 8                          | Boston Children's Hospital                        |
| Ecklund K                               | 8                          | Boston Children's Hospital                        |
| Freiberger C                            | 8                          | Boston Children's Hospital                        |
| Henderson R                             | 8                          | Boston Children's Hospital                        |

\*Institution present in both time periods.
